# Supplementary material for: Structural library of coordination polymers based on flexible linkers exploiting the role of linker coordination angle: synthesis, structural characterization and magnetic properties
Source: Royal Society of Chemistry journal article supplement (doi:10.1039/c3ce42637h), 2014-01-01
Supplement: c3ce42637h1.pdf [file c3ce42637h1.pdf]

**Structural library of coordination polymers based on flexible linkers exploiting the role of linker coordination angle; synthesis structural characterization and magnetic properties**

**Bharat Kumar Tripuramallu, Paulami Manna and Samar K .Das\***

School of chemistry, University of Hyderabad, Hyderabad-500046  
India

**Contents**

- 1. Complete list of Bond lengths and Bond angles**
- 2.  $1/\chi_M$  vs  $T$  plots**
- 3. Powder X-ray diffraction patterns**
- 4. TGA Curves**
- 5. DRS spectra**

## Section-1

### Complete list of Bondlengths and Bond angles of the compounds presented in the study

#### Compound 1a

|               |          |                     |            |
|---------------|----------|---------------------|------------|
| Co(1)-O(3)#1  | 2.009(2) | O(3)#1-Co(1)-N(3)   | 109.22(10) |
| Co(1)-N(3)    | 2.035(3) | O(3)#1-Co(1)-N(1)   | 114.22(10) |
| Co(1)-N(1)    | 2.035(3) | N(3)-Co(1)-N(1)     | 112.33(11) |
| Co(1)-O(1)    | 2.042(2) | O(3)#1-Co(1)-O(1)   | 122.71(9)  |
| O(1)-C(1)     | 1.265(4) | N(3)-Co(1)-O(1)     | 92.59(10)  |
| O(2)-C(1)     | 1.237(4) | N(1)-Co(1)-O(1)     | 103.87(10) |
| O(3)-C(10)    | 1.277(4) | C(1)-O(1)-Co(1)     | 102.5(2)   |
| O(3)-Co(1)#2  | 2.009(2) | C(10)-O(3)-Co(1)#2  | 105.01(19) |
| O(4)-C(10)    | 1.232(4) | C(11)-N(2)-C(13)    | 106.3(3)   |
| N(2)-C(11)    | 1.336(4) | C(11)-N(2)-C(14)    | 125.4(3)   |
| N(2)-C(13)    | 1.374(4) | C(13)-N(2)-C(14)    | 128.2(3)   |
| N(2)-C(14)    | 1.468(4) | C(11)-N(1)-C(12)    | 104.1(3)   |
| N(1)-C(11)    | 1.316(4) | C(11)-N(1)-Co(1)    | 126.5(2)   |
| N(1)-C(12)    | 1.376(4) | C(12)-N(1)-Co(1)    | 129.4(2)   |
| N(4)-C(21)    | 1.345(4) | C(21)-N(4)-C(23)    | 106.4(3)   |
| N(4)-C(23)    | 1.370(4) | C(21)-N(4)-C(24)    | 125.2(3)   |
| N(4)-C(24)    | 1.467(4) | C(23)-N(4)-C(24)    | 128.1(3)   |
| N(3)-C(21)    | 1.321(4) | C(21)-N(3)-C(22)    | 105.5(3)   |
| N(3)-C(22)    | 1.382(4) | C(21)-N(3)-Co(1)    | 124.9(2)   |
| C(3)-C(4)     | 1.394(4) | C(22)-N(3)-Co(1)    | 129.5(2)   |
| C(3)-C(8)     | 1.398(5) | C(4)-C(3)-C(8)      | 118.8(3)   |
| C(3)-C(2)     | 1.509(4) | C(4)-C(3)-C(2)      | 120.1(3)   |
| C(20)-C(15)   | 1.389(4) | C(8)-C(3)-C(2)      | 121.0(3)   |
| C(20)-C(19)   | 1.394(5) | C(15)-C(20)-C(19)   | 119.4(3)   |
| C(20)-C(24)#3 | 1.513(4) | C(15)-C(20)-C(24)#3 | 121.9(3)   |
| C(1)-C(2)     | 1.542(4) | C(19)-C(20)-C(24)#3 | 118.7(3)   |
| C(10)-C(9)    | 1.533(4) | O(2)-C(1)-O(1)      | 122.4(3)   |
| C(8)-C(7)     | 1.399(4) | O(2)-C(1)-C(2)      | 120.5(3)   |
| C(8)-C(9)     | 1.494(4) | O(1)-C(1)-C(2)      | 117.1(3)   |
| C(19)-C(18)   | 1.379(4) | O(4)-C(10)-O(3)     | 123.0(3)   |
| C(15)-C(16)   | 1.395(4) | O(4)-C(10)-C(9)     | 118.6(3)   |
| C(15)-C(14)   | 1.515(5) | O(3)-C(10)-C(9)     | 118.5(3)   |
| C(13)-C(12)   | 1.344(5) | C(7)-C(8)-C(3)      | 118.5(3)   |
| C(16)-C(17)   | 1.376(5) | C(7)-C(8)-C(9)      | 119.1(3)   |
| C(7)-C(6)     | 1.370(5) | C(3)-C(8)-C(9)      | 122.4(3)   |
| C(23)-C(22)   | 1.345(5) | C(18)-C(19)-C(20)   | 120.8(3)   |
| C(17)-C(18)   | 1.373(5) | C(20)-C(15)-C(16)   | 118.9(3)   |
| C(4)-C(5)     | 1.375(5) | C(20)-C(15)-C(14)   | 122.7(3)   |
| C(6)-C(5)     | 1.370(5) | C(16)-C(15)-C(14)   | 118.4(3)   |
| C(6)-H(31)    | 0.9300   | C(12)-C(13)-N(2)    | 106.2(3)   |
| C(24)-C(20)#4 | 1.513(4) | C(17)-C(16)-C(15)   | 121.1(3)   |
|               |          | N(1)-C(11)-N(2)     | 112.8(3)   |
|               |          | C(13)-C(12)-N(1)    | 110.5(3)   |

|                   |          |                    |          |
|-------------------|----------|--------------------|----------|
| C(6)-C(7)-C(8)    | 121.5(4) | N(2)-C(14)-C(15)   | 111.7(3) |
| C(22)-C(23)-N(4)  | 107.4(3) | N(2)-C(14)-H(32A)  | 109.3    |
| C(18)-C(17)-C(16) | 120.0(3) | N(4)-C(24)-C(20)#4 | 112.3(3) |
| C(5)-C(4)-C(3)    | 121.4(4) | C(8)-C(9)-C(10)    | 117.5(3) |
| C(3)-C(2)-C(1)    | 113.6(3) |                    |          |
| C(23)-C(22)-N(3)  | 109.1(3) | C(6)-C(5)-C(4)     | 119.8(4) |
| C(23)-C(22)-H(30) | 125.5    | C(17)-C(18)-C(19)  | 119.9(3) |
| N(3)-C(22)-H(30)  | 125.5    |                    |          |
| C(5)-C(6)-C(7)    | 119.9(4) |                    |          |

Symmetry transformations used to generate equivalent atoms:

#1  $x-1, y, z$  #2  $x+1, y, z$  #3  $-x+1, y+1/2, -z+1/2$  #4  $-x+1, y-1/2, -z+1/2$

### Compound 2a

|                     |            |                     |            |
|---------------------|------------|---------------------|------------|
| Co(1)-O(1)          | 1.957(2)   | C(10)-N(1)-Co(1)    | 126.2(2)   |
| Co(1)-O(1)#1        | 1.957(2)   | C(1)-O(1)-Co(1)     | 115.8(2)   |
| Co(1)-N(1)#1        | 2.023(3)   | C(9)-C(8)-C(9)#2    | 106.8(4)   |
| Co(1)-N(1)          | 2.023(3)   | C(9)-C(8)-C(5)#2    | 113.51(19) |
| F(2)-C(9)           | 1.344(5)   | C(9)#2-C(8)-C(5)#2  | 106.50(18) |
| F(3)-C(9)           | 1.331(4)   | C(9)-C(8)-C(5)      | 106.51(18) |
| F(1)-C(9)           | 1.338(4)   | C(9)#2-C(8)-C(5)    | 113.51(19) |
| O(2)-C(1)           | 1.243(4)   | C(5)#2-C(8)-C(5)    | 110.1(4)   |
| N(1)-C(12)          | 1.323(4)   | C(3)-C(2)-C(7)      | 119.0(3)   |
| N(1)-C(10)          | 1.377(5)   | C(3)-C(2)-C(1)      | 120.4(3)   |
| O(1)-C(1)           | 1.287(4)   | C(7)-C(2)-C(1)      | 120.6(3)   |
| C(8)-C(9)           | 1.544(5)   | F(3)-C(9)-F(1)      | 107.3(3)   |
| C(8)-C(9)#2         | 1.545(5)   | F(3)-C(9)-F(2)      | 106.6(3)   |
| C(8)-C(5)#2         | 1.550(4)   | F(1)-C(9)-F(2)      | 106.7(3)   |
| C(8)-C(5)           | 1.550(4)   | F(3)-C(9)-C(8)      | 113.7(3)   |
| C(2)-C(3)           | 1.386(5)   | F(1)-C(9)-C(8)      | 111.0(3)   |
| C(2)-C(7)           | 1.390(5)   | F(2)-C(9)-C(8)      | 111.1(3)   |
| C(2)-C(1)           | 1.511(5)   | C(6)-C(7)-C(2)      | 120.2(3)   |
| C(7)-C(6)           | 1.384(5)   | C(12)-N(2)-C(11)    | 107.0(3)   |
| N(2)-C(12)          | 1.342(4)   | C(12)-N(2)-C(13)    | 127.1(3)   |
| N(2)-C(11)          | 1.371(4)   | C(11)-N(2)-C(13)    | 125.9(3)   |
| N(2)-C(13)          | 1.481(4)   | O(2)-C(1)-O(1)      | 124.9(3)   |
| C(15)-C(16)         | 1.385(5)   | O(2)-C(1)-C(2)      | 119.9(3)   |
| C(15)-C(14)         | 1.389(5)   | O(1)-C(1)-C(2)      | 115.1(3)   |
| C(5)-C(6)           | 1.388(5)   | N(1)-C(12)-N(2)     | 111.6(3)   |
| C(5)-C(4)           | 1.392(5)   | C(16)-C(15)-C(14)   | 120.8(3)   |
| C(3)-C(4)           | 1.391(5)   | C(6)-C(5)-C(4)      | 118.8(3)   |
| C(14)-C(14)#3       | 1.402(7)   | C(6)-C(5)-C(8)      | 117.0(3)   |
| C(14)-C(13)         | 1.511(5)   | C(4)-C(5)-C(8)      | 124.2(3)   |
| C(16)-C(16)#3       | 1.386(7)   | C(2)-C(3)-C(4)      | 120.8(3)   |
| C(11)-C(10)         | 1.352(5)   | C(7)-C(6)-C(5)      | 121.0(3)   |
|                     |            | C(15)-C(14)-C(14)#3 | 119.3(2)   |
| O(1)-Co(1)-O(1)#1   | 115.92(16) | C(15)-C(14)-C(13)   | 117.2(3)   |
| O(1)-Co(1)-N(1)#1   | 112.32(10) | C(14)#3-C(14)-C(13) | 123.5(2)   |
| O(1)#1-Co(1)-N(1)#1 | 107.52(10) | C(3)-C(4)-C(5)      | 120.1(3)   |
| O(1)-Co(1)-N(1)     | 107.52(10) | C(15)-C(16)-C(16)#3 | 119.8(2)   |
| O(1)#1-Co(1)-N(1)   | 112.32(10) | N(2)-C(13)-C(14)    | 110.9(3)   |
| N(1)#1-Co(1)-N(1)   | 100.17(16) | C(11)-C(10)-N(1)    | 109.6(3)   |
| C(12)-N(1)-C(10)    | 105.3(3)   |                     |            |
| C(12)-N(1)-Co(1)    | 128.5(2)   |                     |            |

### Compound 3a

|               |            |                     |          |
|---------------|------------|---------------------|----------|
| C(17)-C(16)   | 1.349(4)   | C(16)-C(17)-N(2)    | 107.1(3) |
| C(17)-N(2)    | 1.355(4)   | C(8)-C(7)-C(6)      | 109.0(2) |
| C(7)-C(8)     | 1.516(4)   | N(2)-C(18)-C(28)#1  | 114.0(3) |
| C(7)-C(6)     | 1.519(4)   | C(7)-C(6)-C(11)     | 110.1(3) |
| C(18)-N(2)    | 1.458(4)   | C(7)-C(6)-C(4)      | 110.9(3) |
| C(18)-C(28)#1 | 1.507(4)   | C(11)-C(6)-C(4)     | 108.6(2) |
| C(6)-C(11)    | 1.524(4)   | N(4)-C(22)-C(23)    | 115.0(2) |
| C(6)-C(4)     | 1.527(4)   | C(17)-C(16)-N(1)    | 108.9(3) |
| C(22)-N(4)    | 1.451(3)   | C(26)-C(27)-C(28)   | 121.1(3) |
| C(22)-C(23)   | 1.510(4)   | C(25)-C(24)-C(23)   | 121.2(3) |
| C(16)-N(1)    | 1.370(3)   | C(25)-C(26)-C(27)   | 120.2(3) |
| C(27)-C(26)   | 1.373(4)   | C(6)-C(4)-C(3)      | 110.2(2) |
| C(27)-C(28)   | 1.386(4)   | C(7)-C(8)-C(12)     | 109.4(3) |
| C(24)-C(25)   | 1.375(4)   | C(7)-C(8)-C(9)      | 109.5(3) |
| C(24)-C(23)   | 1.383(4)   | C(12)-C(8)-C(9)     | 108.5(2) |
| C(26)-C(25)   | 1.370(4)   | C(8)-C(12)-C(3)     | 111.4(2) |
| C(4)-C(3)     | 1.528(3)   | C(20)-C(21)-N(4)    | 106.6(2) |
| C(8)-C(12)    | 1.518(4)   | C(26)-C(25)-C(24)   | 119.5(3) |
| C(8)-C(9)     | 1.524(4)   | N(1)-C(15)-N(2)     | 111.3(3) |
| C(12)-C(3)    | 1.544(4)   | C(21)-C(20)-N(3)    | 109.6(3) |
| C(21)-C(20)   | 1.339(4)   | C(10)-C(11)-C(6)    | 110.4(2) |
| C(21)-N(4)    | 1.372(4)   | O(3)-C(13)-O(4)     | 119.7(3) |
| C(15)-N(1)    | 1.315(3)   | O(3)-C(13)-C(14)    | 118.6(3) |
| C(15)-N(2)    | 1.340(3)   | O(4)-C(13)-C(14)    | 121.7(3) |
| O(3)-C(13)    | 1.243(4)   | C(27)-C(28)-C(23)   | 118.7(3) |
| C(20)-N(3)    | 1.375(3)   | C(27)-C(28)-C(18)#2 | 121.9(3) |
| C(11)-C(10)   | 1.524(4)   | C(23)-C(28)-C(18)#2 | 119.3(3) |
| C(13)-O(4)    | 1.257(4)   | C(8)-C(9)-C(10)     | 111.3(2) |
| C(13)-C(14)   | 1.511(4)   | C(1)-C(2)-C(3)      | 119.1(2) |
| C(28)-C(23)   | 1.396(4)   | N(3)-C(19)-N(4)     | 111.6(2) |
| C(28)-C(18)#2 | 1.507(4)   | C(4)-C(3)-C(5)      | 108.3(2) |
| C(9)-C(10)    | 1.539(4)   | C(4)-C(3)-C(2)      | 114.1(2) |
| C(2)-C(1)     | 1.511(4)   | C(5)-C(3)-C(2)      | 110.7(2) |
| C(2)-C(3)     | 1.537(4)   | C(4)-C(3)-C(12)     | 108.2(2) |
| C(19)-N(3)    | 1.306(3)   | C(5)-C(3)-C(12)     | 108.2(2) |
| C(19)-N(4)    | 1.344(3)   | C(2)-C(3)-C(12)     | 107.0(2) |
| C(3)-C(5)     | 1.534(3)   | C(11)-C(10)-C(5)    | 109.1(2) |
| C(10)-C(5)    | 1.533(4)   | C(11)-C(10)-C(9)    | 107.9(2) |
| C(10)-C(14)#3 | 1.543(4)   | C(5)-C(10)-C(9)     | 108.0(2) |
| O(2)-C(1)     | 1.228(3)   | C(11)-C(10)-C(14)#3 | 112.6(2) |
| C(1)-O(1)     | 1.263(3)   | C(5)-C(10)-C(14)#3  | 112.5(2) |
| N(1)-Co(1)    | 2.053(2)   | C(9)-C(10)-C(14)#3  | 106.5(2) |
| N(3)-Co(1)    | 2.056(2)   | C(24)-C(23)-C(28)   | 119.2(3) |
| O(1)-Co(1)    | 1.9638(19) | C(24)-C(23)-C(22)   | 121.8(3) |
| O(4)-Co(1)    | 2.015(2)   | C(28)-C(23)-C(22)   | 119.0(2) |
| C(14)-C(10)#4 | 1.543(4)   | C(15)-N(2)-C(17)    | 106.9(3) |
|               |            | C(15)-N(2)-C(18)    | 126.4(3) |

|                  |            |                     |            |
|------------------|------------|---------------------|------------|
| C(17)-N(2)-C(18) | 126.7(3)   | C(20)-N(3)-Co(1)    | 119.03(18) |
| C(19)-N(4)-C(21) | 106.5(2)   | C(10)-C(5)-C(3)     | 111.2(2)   |
| C(19)-N(4)-C(22) | 125.8(3)   | C(1)-O(1)-Co(1)     | 109.29(17) |
| C(21)-N(4)-C(22) | 127.7(2)   | C(13)-O(4)-Co(1)    | 100.83(19) |
| O(2)-C(1)-O(1)   | 122.0(3)   | O(1)-Co(1)-O(4)     | 141.21(9)  |
| O(2)-C(1)-C(2)   | 120.5(3)   | O(1)-Co(1)-N(1)     | 106.33(9)  |
| O(1)-C(1)-C(2)   | 117.3(2)   | O(4)-Co(1)-N(1)     | 96.59(9)   |
| C(15)-N(1)-C(16) | 105.8(2)   | O(1)-Co(1)-N(3)     | 95.75(9)   |
| C(15)-N(1)-Co(1) | 127.4(2)   | O(4)-Co(1)-N(3)     | 106.29(9)  |
| C(16)-N(1)-Co(1) | 126.0(2)   | N(1)-Co(1)-N(3)     | 108.43(9)  |
| C(19)-N(3)-C(20) | 105.6(2)   | C(13)-C(14)-C(10)#4 | 116.8(2)   |
| C(19)-N(3)-Co(1) | 134.77(19) |                     |            |

Symmetry transformations used to generate equivalent atoms:

#1  $x, -y - 1/2, z - 1/2$  #2  $x, -y - 1/2, z + 1/2$

#3  $-x + 1, y + 1/2, -z + 1/2$  #4  $-x + 1, y - 1/2, -z + 1/2$

### **Compound 3b**

|             |            |                  |           |
|-------------|------------|------------------|-----------|
| Co(1)-O(3)  | 2.0515(17) | C(7)-C(14)#1     | 1.515(4)  |
| Co(1)-N(3)  | 2.062(2)   | C(10)-C(9)       | 1.391(4)  |
| Co(1)-N(1)  | 2.082(2)   | C(15)-C(16)      | 1.507(3)  |
| Co(1)-O(1)  | 2.1582(18) | C(28)-C(27)#2    | 1.508(3)  |
| Co(1)-O(2)  | 2.1674(18) | C(18)-C(19)      | 1.533(4)  |
| Co(1)-O(4)  | 2.2718(16) | C(25)-C(20)      | 1.517(5)  |
| Co(1)-C(28) | 2.496(2)   | C(25)-C(24)      | 1.519(4)  |
| Co(1)-C(15) | 2.502(2)   | C(25)-C(26)      | 1.521(4)  |
| O(4)-C(28)  | 1.256(3)   | C(21)-C(19)      | 1.523(4)  |
| N(2)-C(1)   | 1.342(3)   | C(2)-C(3)        | 1.337(4)  |
| N(2)-C(3)   | 1.374(3)   | C(8)-C(9)        | 1.364(5)  |
| N(2)-C(4)   | 1.457(3)   | C(13)-C(12)      | 1.339(4)  |
| O(3)-C(28)  | 1.261(3)   | C(19)-C(20)      | 1.525(5)  |
| O(2)-C(15)  | 1.260(3)   | C(27)-C(28)#3    | 1.508(3)  |
| O(1)-C(15)  | 1.245(3)   | C(14)-C(7)#4     | 1.515(4)  |
| C(17)-C(22) | 1.526(3)   |                  |           |
| C(17)-C(18) | 1.529(3)   | O(3)-Co(1)-N(3)  | 98.87(8)  |
| C(17)-C(26) | 1.529(3)   | O(3)-Co(1)-N(1)  | 103.44(8) |
| C(17)-C(16) | 1.545(3)   | N(3)-Co(1)-N(1)  | 91.01(8)  |
| N(1)-C(1)   | 1.308(3)   | O(3)-Co(1)-O(1)  | 101.65(7) |
| N(1)-C(2)   | 1.378(3)   | N(3)-Co(1)-O(1)  | 94.30(8)  |
| N(4)-C(11)  | 1.343(3)   | N(1)-Co(1)-O(1)  | 153.20(8) |
| N(4)-C(13)  | 1.356(3)   | O(3)-Co(1)-O(2)  | 158.96(8) |
| N(4)-C(14)  | 1.465(3)   | N(3)-Co(1)-O(2)  | 92.92(7)  |
| C(5)-C(10)  | 1.375(3)   | N(1)-Co(1)-O(2)  | 93.65(7)  |
| C(5)-C(6)   | 1.390(3)   | O(1)-Co(1)-O(2)  | 59.89(7)  |
| C(5)-C(4)   | 1.499(3)   | O(3)-Co(1)-O(4)  | 60.21(6)  |
| N(3)-C(11)  | 1.313(3)   | N(3)-Co(1)-O(4)  | 158.23(8) |
| N(3)-C(12)  | 1.367(3)   | N(1)-Co(1)-O(4)  | 88.53(7)  |
| C(23)-C(21) | 1.520(3)   | O(1)-Co(1)-O(4)  | 95.87(7)  |
| C(23)-C(24) | 1.524(3)   | O(2)-Co(1)-O(4)  | 108.83(7) |
| C(23)-C(27) | 1.533(3)   | O(3)-Co(1)-C(28) | 30.23(7)  |
| C(23)-C(22) | 1.539(3)   | N(3)-Co(1)-C(28) | 128.52(9) |
| C(7)-C(8)   | 1.360(4)   | N(1)-Co(1)-C(28) | 94.97(8)  |
| C(7)-C(6)   | 1.382(4)   | O(1)-Co(1)-C(28) | 102.05(7) |

|                   |            |                     |            |
|-------------------|------------|---------------------|------------|
| O(2)-Co(1)-C(28)  | 137.36(8)  | C(8)-C(7)-C(6)      | 118.7(3)   |
| O(4)-Co(1)-C(28)  | 30.09(7)   | C(8)-C(7)-C(14)#1   | 120.7(3)   |
| O(3)-Co(1)-C(15)  | 131.32(8)  | C(6)-C(7)-C(14)#1   | 120.6(3)   |
| N(3)-Co(1)-C(15)  | 91.56(8)   | N(1)-C(1)-N(2)      | 112.6(2)   |
| N(1)-Co(1)-C(15)  | 123.90(8)  | C(5)-C(10)-C(9)     | 120.5(3)   |
| O(1)-Co(1)-C(15)  | 29.84(7)   | O(1)-C(15)-O(2)     | 119.0(2)   |
| O(2)-Co(1)-C(15)  | 30.25(7)   | O(1)-C(15)-C(16)    | 121.0(2)   |
| O(4)-Co(1)-C(15)  | 106.70(7)  | O(2)-C(15)-C(16)    | 119.9(2)   |
| C(28)-Co(1)-C(15) | 124.91(8)  | O(1)-C(15)-Co(1)    | 59.62(13)  |
| C(28)-O(4)-Co(1)  | 84.89(14)  | O(2)-C(15)-Co(1)    | 60.04(13)  |
| C(1)-N(2)-C(3)    | 106.3(2)   | C(16)-C(15)-Co(1)   | 171.61(16) |
| C(1)-N(2)-C(4)    | 126.4(2)   | O(4)-C(28)-O(3)     | 119.7(2)   |
| C(3)-N(2)-C(4)    | 126.7(2)   | O(4)-C(28)-C(27)#2  | 120.8(2)   |
| C(28)-O(3)-Co(1)  | 94.79(15)  | O(3)-C(28)-C(27)#2  | 119.5(2)   |
| C(15)-O(2)-Co(1)  | 89.70(15)  | O(4)-C(28)-Co(1)    | 65.02(12)  |
| C(15)-O(1)-Co(1)  | 90.54(15)  | O(3)-C(28)-Co(1)    | 54.98(12)  |
| C(22)-C(17)-C(18) | 108.26(19) | C(27)#2-C(28)-Co(1) | 170.89(18) |
| C(22)-C(17)-C(26) | 107.8(2)   | C(17)-C(18)-C(19)   | 109.7(2)   |
| C(18)-C(17)-C(26) | 109.1(2)   | N(2)-C(4)-C(5)      | 112.5(2)   |
| C(22)-C(17)-C(16) | 111.62(19) | C(15)-C(16)-C(17)   | 114.37(19) |
| C(18)-C(17)-C(16) | 112.33(19) | C(20)-C(25)-C(24)   | 109.6(2)   |
| C(26)-C(17)-C(16) | 107.67(19) | C(20)-C(25)-C(26)   | 108.9(3)   |
| C(1)-N(1)-C(2)    | 104.3(2)   | C(24)-C(25)-C(26)   | 109.9(2)   |
| C(1)-N(1)-Co(1)   | 130.95(17) | C(7)-C(6)-C(5)      | 121.4(3)   |
| C(2)-N(1)-Co(1)   | 122.43(18) | C(23)-C(21)-C(19)   | 110.3(2)   |
| C(11)-N(4)-C(13)  | 107.2(2)   | C(3)-C(2)-N(1)      | 110.7(2)   |
| C(11)-N(4)-C(14)  | 126.5(3)   | N(3)-C(11)-N(4)     | 111.2(2)   |
| C(13)-N(4)-C(14)  | 126.4(2)   | C(7)-C(8)-C(9)      | 121.5(3)   |
| C(10)-C(5)-C(6)   | 118.2(2)   | C(12)-C(13)-N(4)    | 106.3(2)   |
| C(10)-C(5)-C(4)   | 121.2(2)   | C(13)-C(12)-N(3)    | 110.2(3)   |
| C(6)-C(5)-C(4)    | 120.5(2)   | C(25)-C(26)-C(17)   | 110.7(2)   |
| C(11)-N(3)-C(12)  | 105.1(2)   | C(8)-C(9)-C(10)     | 119.5(3)   |
| C(11)-N(3)-Co(1)  | 128.82(17) | C(21)-C(19)-C(20)   | 109.4(3)   |
| C(12)-N(3)-Co(1)  | 125.82(19) | C(21)-C(19)-C(18)   | 109.6(2)   |
| C(21)-C(23)-C(24) | 108.8(2)   | C(20)-C(19)-C(18)   | 109.9(2)   |
| C(21)-C(23)-C(27) | 111.6(2)   | C(28)#3-C(27)-C(23) | 116.2(2)   |
| C(24)-C(23)-C(27) | 112.4(2)   | N(4)-C(14)-C(7)#4   | 112.2(2)   |
| C(21)-C(23)-C(22) | 108.63(19) | C(25)-C(24)-C(23)   | 110.5(2)   |
| C(24)-C(23)-C(22) | 107.61(19) | C(2)-C(3)-N(2)      | 106.1(2)   |
| C(27)-C(23)-C(22) | 107.65(18) | C(25)-C(20)-C(19)   | 109.3(2)   |
| C(17)-C(22)-C(23) | 112.21(18) |                     |            |

### Compound 4a

|             |            |             |          |
|-------------|------------|-------------|----------|
| Co(1)-O(3)  | 2.0515(17) | O(4)-C(28)  | 1.256(3) |
| Co(1)-N(3)  | 2.062(2)   | N(2)-C(1)   | 1.342(3) |
| Co(1)-N(1)  | 2.082(2)   | N(2)-C(3)   | 1.374(3) |
| Co(1)-O(1)  | 2.1582(18) | N(2)-C(4)   | 1.457(3) |
| Co(1)-O(2)  | 2.1674(18) | O(3)-C(28)  | 1.261(3) |
| Co(1)-O(4)  | 2.2718(16) | O(2)-C(15)  | 1.260(3) |
| Co(1)-C(28) | 2.496(2)   | O(1)-C(15)  | 1.245(3) |
| Co(1)-C(15) | 2.502(2)   | C(17)-C(22) | 1.526(3) |

|                  |           |                     |            |
|------------------|-----------|---------------------|------------|
| C(17)-C(18)      | 1.529(3)  | O(3)-Co(1)-C(15)    | 131.32(8)  |
| C(17)-C(26)      | 1.529(3)  | N(3)-Co(1)-C(15)    | 91.56(8)   |
| C(17)-C(16)      | 1.545(3)  | N(1)-Co(1)-C(15)    | 123.90(8)  |
| N(1)-C(1)        | 1.308(3)  | O(1)-Co(1)-C(15)    | 29.84(7)   |
| N(1)-C(2)        | 1.378(3)  | O(2)-Co(1)-C(15)    | 30.25(7)   |
| N(4)-C(11)       | 1.343(3)  | O(4)-Co(1)-C(15)    | 106.70(7)  |
| N(4)-C(13)       | 1.356(3)  | C(28)-Co(1)-C(15)   | 124.91(8)  |
| N(4)-C(14)       | 1.465(3)  | C(28)-O(4)-Co(1)    | 84.89(14)  |
| C(5)-C(10)       | 1.375(3)  | C(1)-N(2)-C(3)      | 106.3(2)   |
| C(5)-C(6)        | 1.390(3)  | C(1)-N(2)-C(4)      | 126.4(2)   |
| C(5)-C(4)        | 1.499(3)  | C(3)-N(2)-C(4)      | 126.7(2)   |
| N(3)-C(11)       | 1.313(3)  | C(28)-O(3)-Co(1)    | 94.79(15)  |
| N(3)-C(12)       | 1.367(3)  | C(15)-O(2)-Co(1)    | 89.70(15)  |
| C(23)-C(21)      | 1.520(3)  | C(15)-O(1)-Co(1)    | 90.54(15)  |
| C(23)-C(24)      | 1.524(3)  | C(22)-C(17)-C(18)   | 108.26(19) |
| C(23)-C(27)      | 1.533(3)  | C(22)-C(17)-C(26)   | 107.8(2)   |
| C(23)-C(22)      | 1.539(3)  | C(18)-C(17)-C(26)   | 109.1(2)   |
| C(7)-C(8)        | 1.360(4)  | C(22)-C(17)-C(16)   | 111.62(19) |
| C(7)-C(6)        | 1.382(4)  | C(18)-C(17)-C(16)   | 112.33(19) |
| C(7)-C(14)#1     | 1.515(4)  | C(26)-C(17)-C(16)   | 107.67(19) |
| C(10)-C(9)       | 1.391(4)  | C(1)-N(1)-C(2)      | 104.3(2)   |
| C(15)-C(16)      | 1.507(3)  | C(1)-N(1)-Co(1)     | 130.95(17) |
| C(28)-C(27)#2    | 1.508(3)  | C(2)-N(1)-Co(1)     | 122.43(18) |
| C(18)-C(19)      | 1.533(4)  | C(11)-N(4)-C(13)    | 107.2(2)   |
| C(25)-C(20)      | 1.517(5)  | C(11)-N(4)-C(14)    | 126.5(3)   |
| C(25)-C(24)      | 1.519(4)  | C(13)-N(4)-C(14)    | 126.4(2)   |
| C(25)-C(26)      | 1.521(4)  | C(10)-C(5)-C(6)     | 118.2(2)   |
| C(21)-C(19)      | 1.523(4)  | C(10)-C(5)-C(4)     | 121.2(2)   |
| C(2)-C(3)        | 1.337(4)  | C(6)-C(5)-C(4)      | 120.5(2)   |
| C(8)-C(9)        | 1.364(5)  | C(11)-N(3)-C(12)    | 105.1(2)   |
| C(13)-C(12)      | 1.339(4)  | C(11)-N(3)-Co(1)    | 128.82(17) |
| C(19)-C(20)      | 1.525(5)  | C(12)-N(3)-Co(1)    | 125.82(19) |
| C(27)-C(28)#3    | 1.508(3)  | C(21)-C(23)-C(24)   | 108.8(2)   |
| C(14)-C(7)#4     | 1.515(4)  | C(21)-C(23)-C(27)   | 111.6(2)   |
|                  |           | C(24)-C(23)-C(27)   | 112.4(2)   |
| O(3)-Co(1)-N(3)  | 98.87(8)  | C(21)-C(23)-C(22)   | 108.63(19) |
| O(3)-Co(1)-N(1)  | 103.44(8) | C(24)-C(23)-C(22)   | 107.61(19) |
| N(3)-Co(1)-N(1)  | 91.01(8)  | C(27)-C(23)-C(22)   | 107.65(18) |
| O(3)-Co(1)-O(1)  | 101.65(7) | C(17)-C(22)-C(23)   | 112.21(18) |
| N(3)-Co(1)-O(1)  | 94.30(8)  | C(8)-C(7)-C(6)      | 118.7(3)   |
| N(1)-Co(1)-O(1)  | 153.20(8) | C(8)-C(7)-C(14)#1   | 120.7(3)   |
| O(3)-Co(1)-O(2)  | 158.96(8) | C(6)-C(7)-C(14)#1   | 120.6(3)   |
| N(3)-Co(1)-O(2)  | 92.92(7)  | N(1)-C(1)-N(2)      | 112.6(2)   |
| N(1)-Co(1)-O(2)  | 93.65(7)  | C(5)-C(10)-C(9)     | 120.5(3)   |
| O(1)-Co(1)-O(2)  | 59.89(7)  | O(1)-C(15)-O(2)     | 119.0(2)   |
| O(3)-Co(1)-O(4)  | 60.21(6)  | O(1)-C(15)-C(16)    | 121.0(2)   |
| N(3)-Co(1)-O(4)  | 158.23(8) | O(2)-C(15)-C(16)    | 119.9(2)   |
| N(1)-Co(1)-O(4)  | 88.53(7)  | O(1)-C(15)-Co(1)    | 59.62(13)  |
| O(1)-Co(1)-O(4)  | 95.87(7)  | O(2)-C(15)-Co(1)    | 60.04(13)  |
| O(2)-Co(1)-O(4)  | 108.83(7) | C(16)-C(15)-Co(1)   | 171.61(16) |
| O(3)-Co(1)-C(28) | 30.23(7)  | O(4)-C(28)-O(3)     | 119.7(2)   |
| N(3)-Co(1)-C(28) | 128.52(9) | O(4)-C(28)-C(27)#2  | 120.8(2)   |
| N(1)-Co(1)-C(28) | 94.97(8)  | O(3)-C(28)-C(27)#2  | 119.5(2)   |
| O(1)-Co(1)-C(28) | 102.05(7) | O(4)-C(28)-Co(1)    | 65.02(12)  |
| O(2)-Co(1)-C(28) | 137.36(8) | O(3)-C(28)-Co(1)    | 54.98(12)  |
| O(4)-Co(1)-C(28) | 30.09(7)  | C(27)#2-C(28)-Co(1) | 170.89(18) |

|                   |            |                     |          |
|-------------------|------------|---------------------|----------|
| C(17)-C(18)-C(19) | 109.7(2)   | C(13)-C(12)-N(3)    | 110.2(3) |
| N(2)-C(4)-C(5)    | 112.5(2)   | C(25)-C(26)-C(17)   | 110.7(2) |
| C(15)-C(16)-C(17) | 114.37(19) | C(8)-C(9)-C(10)     | 119.5(3) |
| C(20)-C(25)-C(24) | 109.6(2)   | C(21)-C(19)-C(20)   | 109.4(3) |
| C(20)-C(25)-C(26) | 108.9(3)   | C(21)-C(19)-C(18)   | 109.6(2) |
| C(24)-C(25)-C(26) | 109.9(2)   | C(20)-C(19)-C(18)   | 109.9(2) |
| C(7)-C(6)-C(5)    | 121.4(3)   | C(28)#3-C(27)-C(23) | 116.2(2) |
| C(23)-C(21)-C(19) | 110.3(2)   | N(4)-C(14)-C(7)#4   | 112.2(2) |
| C(3)-C(2)-N(1)    | 110.7(2)   | C(25)-C(24)-C(23)   | 110.5(2) |
| N(3)-C(11)-N(4)   | 111.2(2)   | C(2)-C(3)-N(2)      | 106.1(2) |
| C(7)-C(8)-C(9)    | 121.5(3)   | C(25)-C(20)-C(19)   | 109.3(2) |
| C(12)-C(13)-N(4)  | 106.3(2)   |                     |          |

Symmetry transformations used to generate equivalent atoms:

#1 -x+1,-y,-z #2 -x+2,-y+1,-z+1 #3 -x+1,-y,-z+1

### Compound 4b

|              |          |                     |            |
|--------------|----------|---------------------|------------|
| Co(1)-O(3)   | 1.939(3) | O(5)-Co(1)#1        | 1.989(4)   |
| Co(1)-O(5)#1 | 1.989(4) | C(14)-C(15)         | 1.379(5)   |
| Co(1)-O(1)   | 2.000(3) | C(14)-C(13)         | 1.395(5)   |
| Co(1)-N(2)   | 2.116(3) | C(14)-C(17)#5       | 1.462(5)   |
| Co(1)-N(1)   | 2.145(3) |                     |            |
| Co(2)-O(3)   | 1.951(3) | O(3)-Co(1)-O(5)#1   | 127.56(17) |
| Co(2)-O(2)#2 | 1.989(3) | O(3)-Co(1)-O(1)     | 121.80(15) |
| Co(2)-O(4)#3 | 2.004(3) | O(5)#1-Co(1)-O(1)   | 110.63(16) |
| Co(2)-N(5)   | 2.140(3) | O(3)-Co(1)-N(2)     | 82.58(12)  |
| Co(2)-N(3)   | 2.177(3) | O(5)#1-Co(1)-N(2)   | 90.88(14)  |
| O(1)-C(8)    | 1.239(5) | O(1)-Co(1)-N(2)     | 98.76(13)  |
| C(5)-C(6)    | 1.381(6) | O(3)-Co(1)-N(1)     | 91.60(12)  |
| C(5)-C(4)    | 1.405(6) | O(5)#1-Co(1)-N(1)   | 88.55(14)  |
| C(3)-C(1)    | 1.386(7) | O(1)-Co(1)-N(1)     | 88.71(13)  |
| C(3)-C(4)    | 1.392(6) | N(2)-Co(1)-N(1)     | 172.20(12) |
| C(6)-C(2)    | 1.396(7) | O(3)-Co(2)-O(2)#2   | 120.29(15) |
| C(6)-C(7)    | 1.514(6) | O(3)-Co(2)-O(4)#3   | 123.95(15) |
| C(1)-C(2)    | 1.378(7) | O(2)#2-Co(2)-O(4)#3 | 115.64(15) |
| C(8)-O(2)    | 1.251(5) | O(3)-Co(2)-N(5)     | 85.60(12)  |
| C(8)-C(7)    | 1.511(6) | O(2)#2-Co(2)-N(5)   | 98.17(14)  |
| C(4)-C(9)    | 1.509(6) | O(4)#3-Co(2)-N(5)   | 90.25(13)  |
| N(1)-C(11)   | 1.336(5) | O(3)-Co(2)-N(3)     | 85.22(12)  |
| N(1)-C(12)   | 1.347(5) | O(2)#2-Co(2)-N(3)   | 86.70(13)  |
| O(2)-Co(2)#4 | 1.989(3) | O(4)#3-Co(2)-N(3)   | 94.66(13)  |
| C(12)-C(15)  | 1.369(5) | N(5)-Co(2)-N(3)     | 170.82(12) |
| C(11)-C(13)  | 1.382(6) | C(8)-O(1)-Co(1)     | 142.4(3)   |
| C(9)-C(10)   | 1.522(6) | C(6)-C(5)-C(4)      | 122.2(4)   |
| C(10)-O(5)   | 1.238(6) | C(1)-C(3)-C(4)      | 120.7(5)   |
| C(10)-O(4)   | 1.254(5) | C(5)-C(6)-C(2)      | 118.6(4)   |
| N(2)-N(5)#4  | 1.315(4) | C(5)-C(6)-C(7)      | 120.9(4)   |
| N(2)-N(3)    | 1.339(4) | C(2)-C(6)-C(7)      | 120.4(5)   |
| N(5)-N(2)#2  | 1.315(4) | C(2)-C(1)-C(3)      | 120.6(4)   |
| N(5)-N(6)    | 1.332(4) | C(1)-C(2)-C(6)      | 120.3(5)   |
| N(3)-C(17)   | 1.339(5) | O(1)-C(8)-O(2)      | 126.1(4)   |



|                   |            |                     |          |
|-------------------|------------|---------------------|----------|
| O(1)-C(8)-C(7)    | 118.9(4)   | O(4)-C(10)-C(9)     | 117.6(4) |
| O(2)-C(8)-C(7)    | 115.0(4)   | N(5)#4-N(2)-N(3)    | 109.3(3) |
| C(8)-C(7)-C(6)    | 116.4(4)   | N(5)#4-N(2)-Co(1)   | 124.8(2) |
| C(3)-C(4)-C(5)    | 117.6(4)   | N(3)-N(2)-Co(1)     | 125.9(2) |
| C(3)-C(4)-C(9)    | 120.6(4)   | N(2)#2-N(5)-N(6)    | 110.0(3) |
| C(5)-C(4)-C(9)    | 121.8(4)   | N(2)#2-N(5)-Co(2)   | 126.4(2) |
| Co(1)-O(3)-Co(2)  | 129.07(15) | N(6)-N(5)-Co(2)     | 122.9(2) |
| C(11)-N(1)-C(12)  | 116.6(3)   | C(17)-N(3)-N(2)     | 104.9(3) |
| C(11)-N(1)-Co(1)  | 123.4(3)   | C(17)-N(3)-Co(2)    | 139.7(3) |
| C(12)-N(1)-Co(1)  | 120.0(3)   |                     |          |
| C(8)-O(2)-Co(2)#4 | 138.0(3)   | C(10)-O(5)-Co(1)#1  | 140.3(3) |
| N(1)-C(12)-C(15)  | 123.7(4)   | C(15)-C(14)-C(13)   | 117.8(4) |
| N(1)-C(11)-C(13)  | 123.5(4)   | C(15)-C(14)-C(17)#5 | 119.6(3) |
| C(4)-C(9)-C(10)   | 110.5(4)   | C(13)-C(14)-C(17)#5 | 122.6(4) |
| O(5)-C(10)-O(4)   | 126.8(5)   | C(12)-C(15)-C(14)   | 119.5(4) |
| O(5)-C(10)-C(9)   | 115.5(4)   | C(11)-C(13)-C(14)   | 118.9(4) |

Symmetry transformations used to generate equivalent atoms: #1 -x,-y,-z+1 #2 x-1/2,-y+1/2,z-1/2

#3 -x-1/2,y+1/2,-z+1/2 #4 x+1/2,-y+1/2,z+1/2

#5 -x-1/2,y-1/2,-z+1/2

## Section-2

### 1/ $\chi_M$ vs T plots of the compounds 2a, 3b, 4a and 4b

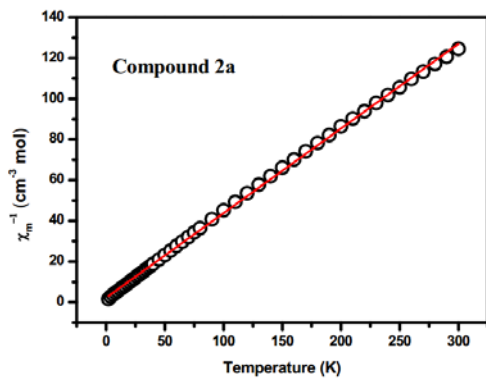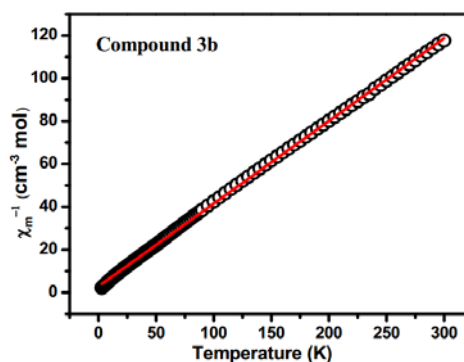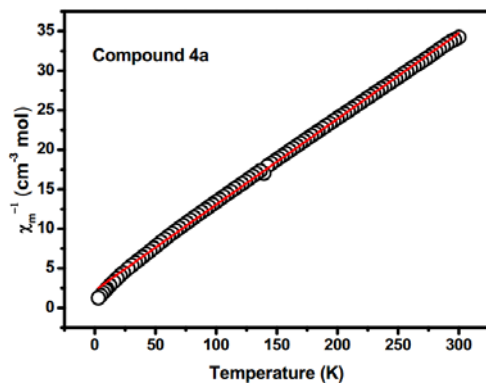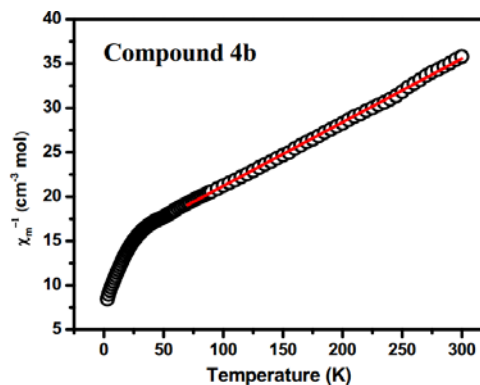

## Section-3

### Powder X-ray diffraction patterns

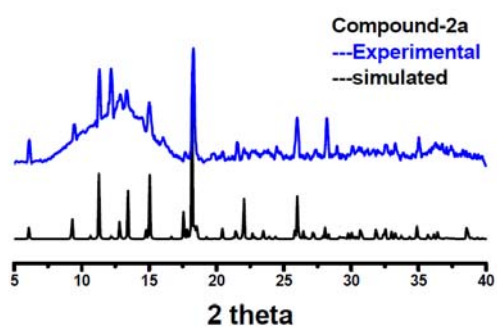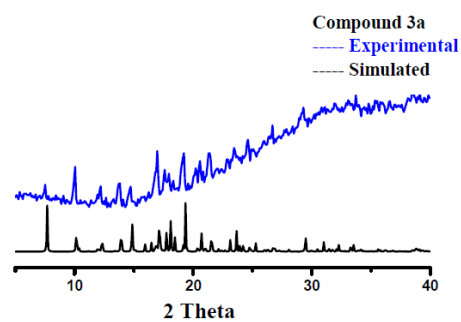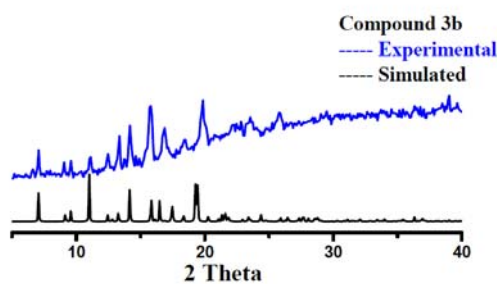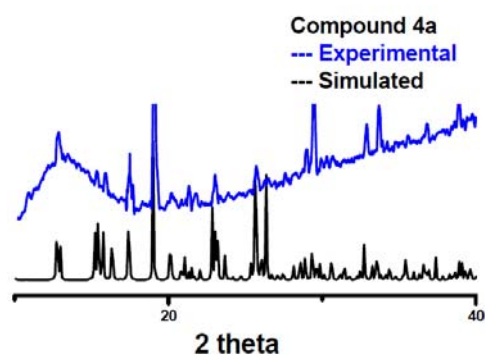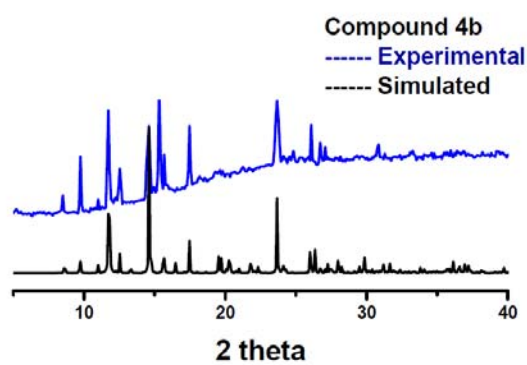

## Section-4

### TGA Curves

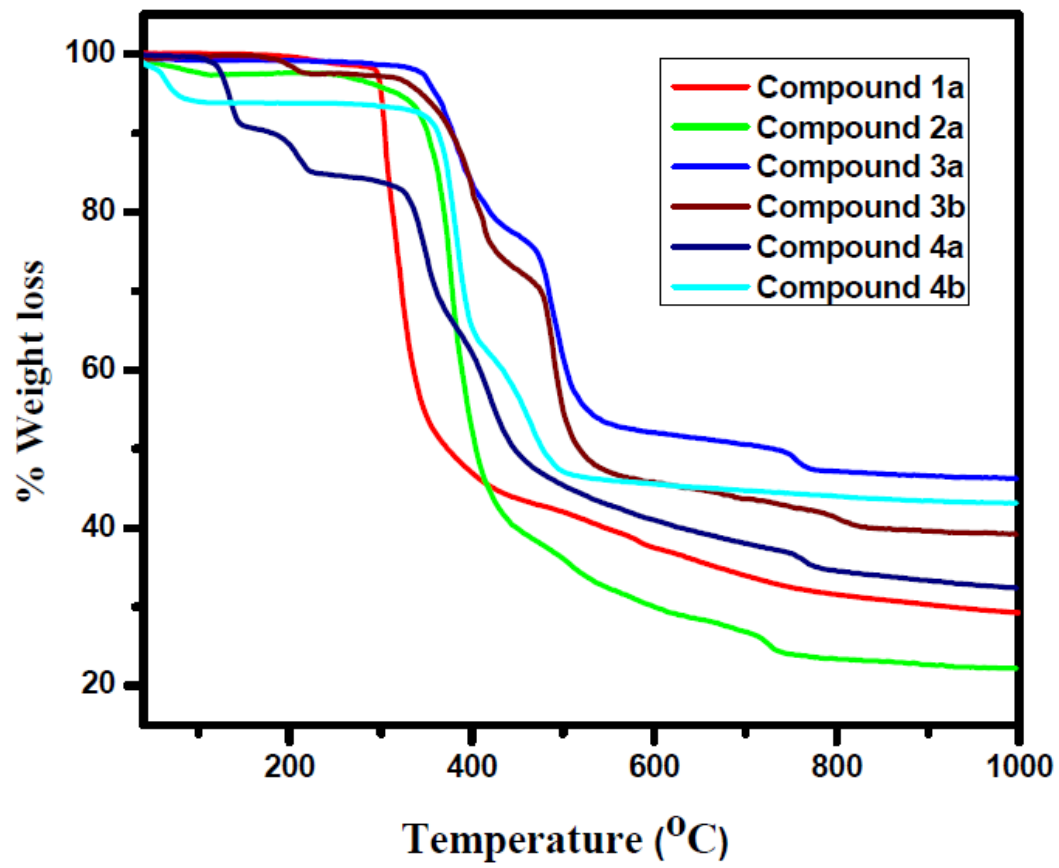

## Section-5

### Diffused Reflectanc Spectra

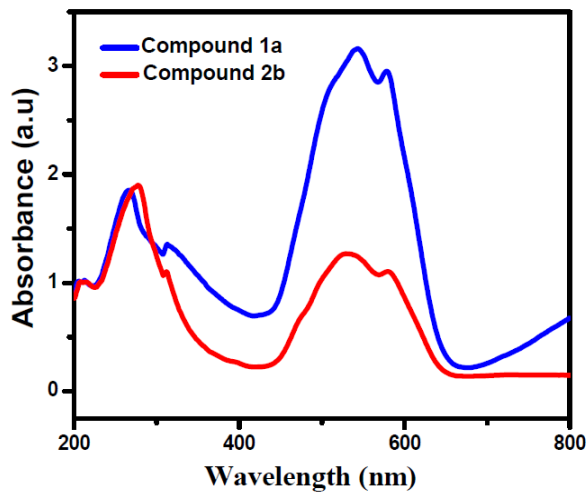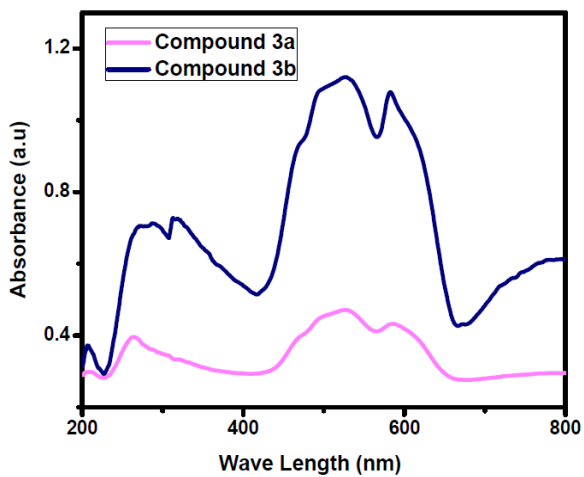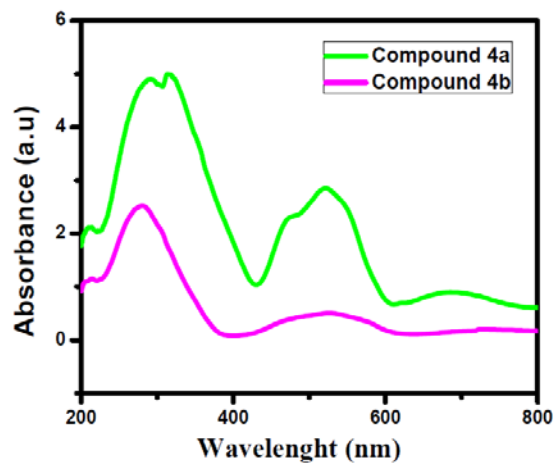

\*\*\*\*\* End of Supporting Information\*\*\*\*\*
